# Supplementary material for: A Peptide/MHCII conformer generated in the presence of exchange peptide is substrate for HLA-DM editing
Source: PubMed Central journal article supplement — Sci Rep. 2012 Apr 27;2:386. doi: 10.1038/srep00386 (PMC3338121; doi:10.1038/srep00386), 2012-04-27
Supplement: srep00386-s1.pdf [file srep00386-s1.pdf]

A PEPTIDE/MHCII CONFORMER GENERATED IN THE PRESENCE OF EXCHANGE PEPTIDE  
IS SUBSTRATE FOR HLA-DM EDITING

Andrea Ferrante and Jack Gorski

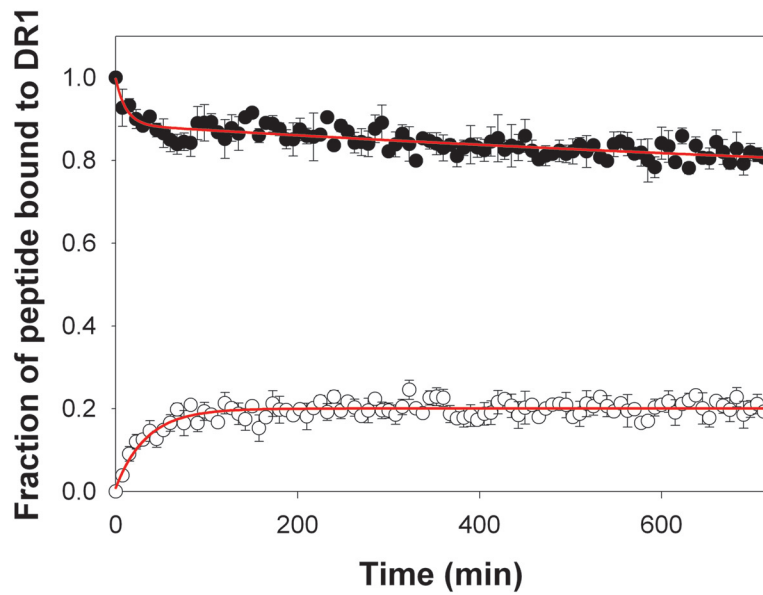

*Supplementary Fig. S1. Reduced release of peptides from MHCII in the presence of DM and in the absence of exchange peptide is not caused by peptide rebinding. HASG/DR complex (100 nM) was incubated with 3 fold DM and allowed to dissociate in absence of any free peptide. Simultaneously, loading of 100 nM of HASG to an equimolar amount of DR in the presence of DM was measured. Reactions were set up in triplicates, and the average  $\pm$ SDs are shown. Lines represent the fit of the data to either a five parameter double exponential decay or four parameters double exponential raise function.*
